# Supplementary material for: Angiopoietin-2 sensitizes endothelial cells to TNF-α and has a crucial role in the induction of inflammation
Source: Springer Nature journal article supplement (doi:10.1038/nm1351), 2006-02-01
Supplement: 41591_2006_BFnm1351_MOESM1_ESM.pdf [file 41591_2006_BFnm1351_MOESM1_ESM.pdf]

Fiedler et al.

Supplementary Figure 1

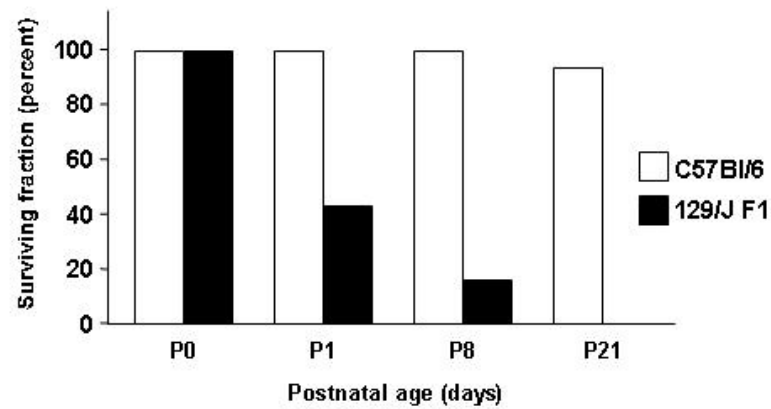

**Supplementary Figure 1.** Breeding statistics of Ang-2-deficient mice bred in the C57Bl/6 background and in the 129/J background. Close to 100% of Ang-2-deficient mice were born apparently normal. Pups in the 129/J background developed progressive chylous ascites and died within 14 days after birth. In contrast, newborn mice bred in the C57Bl/6 background experienced a mild postnatal chylous ascites crisis after birth. More than 90% of mice overcame this crisis and grew phenotypically normal to adulthood.
