# Supplementary material for: Angiopoietin-2 sensitizes endothelial cells to TNF-α and has a crucial role in the induction of inflammation
Source: Springer Nature journal article supplement (doi:10.1038/nm1351), 2006-02-01
Supplement: 41591_2006_BFnm1351_MOESM2_ESM.pdf [file 41591_2006_BFnm1351_MOESM2_ESM.pdf]

Fiedler et al.

Supplementary Figure 2

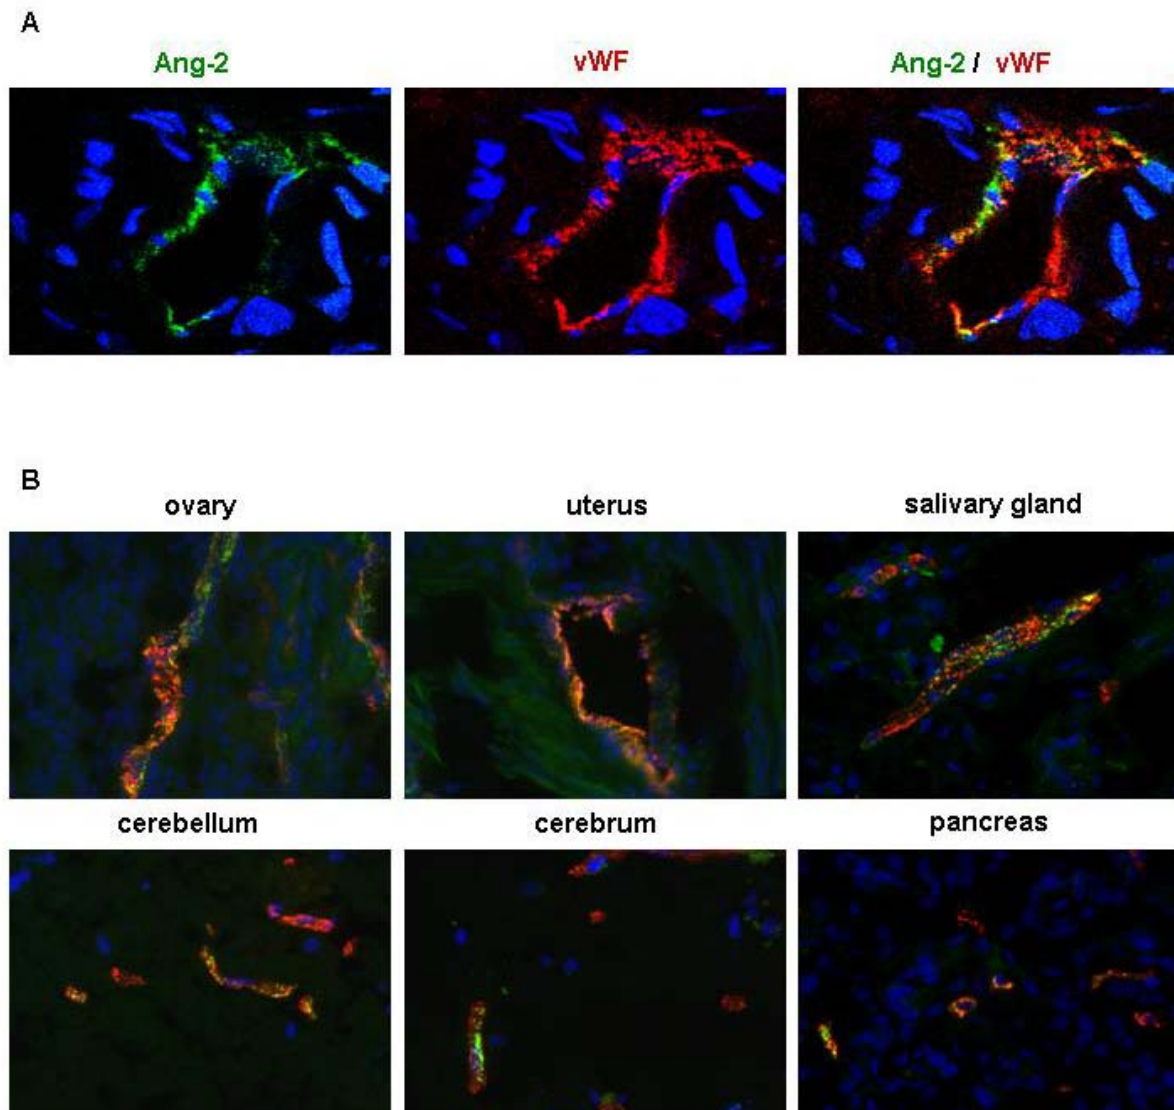

**Supplementary Figure 2.** Ang-2 expression and storage in human tissues. Human tissues were stained for vWF (red) and Ang-2 (green). High resolution confocal microscopy on human colon tissue reveals Ang-2 expression and storage in Weibel-Palade bodies *in vivo* (A). Furthermore, Ang-2 expression and storage was detected in all analyzed tissues (B). Yet, there is regional heterogeneity. Granular Ang-2 is detectable in most endothelial cells of the female reproductive system. Prominent expression is also detectable in the brain. Ang-2 is found in a subset of endothelial cells in most other tissues. Some tissues (e.g., skeletal muscle, cardiac muscle) contain hardly any detectable Weibel-Palade body-stored Ang-2.
