# Supplementary material for: Angiopoietin-2 sensitizes endothelial cells to TNF-α and has a crucial role in the induction of inflammation
Source: Springer Nature journal article supplement (doi:10.1038/nm1351), 2006-02-01
Supplement: 41591_2006_BFnm1351_MOESM3_ESM.pdf [file 41591_2006_BFnm1351_MOESM3_ESM.pdf]

Supplementary Figure 3

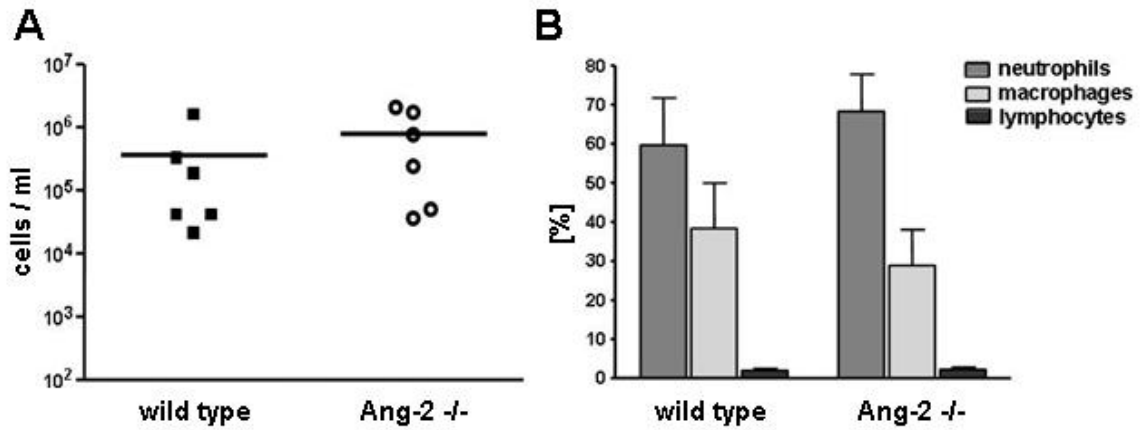

**Supplementary Figure 3.** Analysis of cells recruited into the lung of wild type and Ang2-deficient mice after *Streptococcus pneumoniae* infection. Cells in the bronchoalveolar lavage were quantitated after 36 h of intranasal *Streptococcus pneumoniae* infection ( $5 \times 10^6$  cfu) (A). The composition of the individual cell types was determined by FACS analyses (B). The figure shows the results of one out of two experiments with similar results.
