# Supplementary material for: Angiopoietin-2 sensitizes endothelial cells to TNF-α and has a crucial role in the induction of inflammation
Source: Springer Nature journal article supplement (doi:10.1038/nm1351), 2006-02-01
Supplement: 41591_2006_BFnm1351_MOESM4_ESM.pdf [file 41591_2006_BFnm1351_MOESM4_ESM.pdf]

Supplementary Figure 4

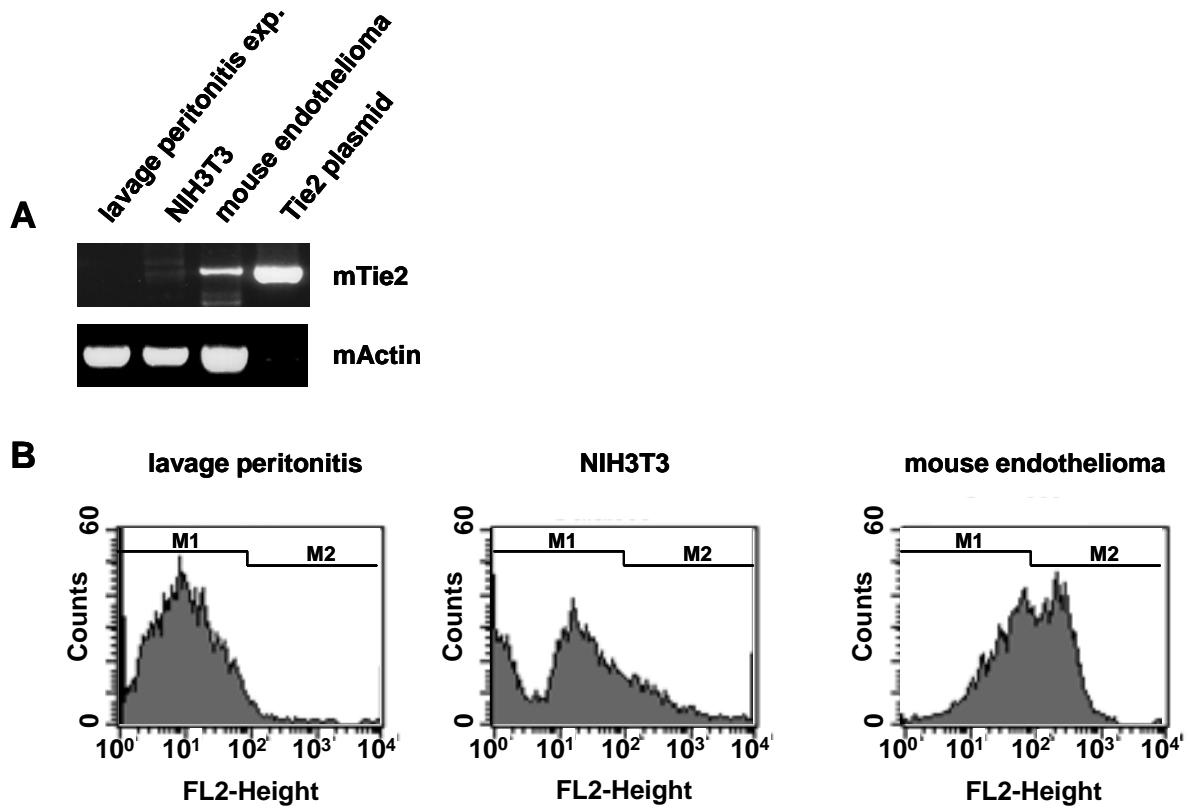

**Supplementary Figure 4.** Tie2 expression in different cell populations. (a) RT-PCR analysis of 1  $\mu$ g mRNA isolated from cells from 1 ml lavage of the thioglycollate-induced peritonitis experiment, mouse fibroblasts (NIH3T3), and a murine endothelioma cell line. An expression plasmid for murine Tie2 was used as a positive control. Tie2 is expressed by endothelioma cells and the plasmid and not by the peritoneal lavage cells. Equal reverse transcription is monitored by equal amplification of murine actin. (b) FACS analysis of Tie2 expression of the peritoneal lavage cells (thioglycollate-induced peritonitis experiment), mouse fibroblasts (NIH3T3) and a murine endothelioma cell line. Tie2 is expressed by murine endothelioma cells. Weak expression is also detectable in the fibroblasts. Cells isolated from the peritoneal lavage following thioglycollate-induced peritonitis do not express detectable levels of Tie2.
